# Supplementary material for: Associations between physical activity and asthma, eczema and obesity in children aged 12–16: an observational cohort study
Source: PubMed Central journal article supplement (PMC6340420; doi:10.1136/bmjopen-2018-024858), 2019-01-20
Supplement: bmjopen-2018-024858supp001.pdf [file bmjopen-2018-024858supp001.pdf]

## **SUPPLEMENTARY MATERIAL**

Russell Jago, Ruth E. Salway, Andy R Ness, Julian P Hamilton-Shield, Matthew J Ridd, A John Henderson, *Associations between Physical Activity and Asthma, Eczema and Obesity in children aged 12-16*

### **List of Supplementary Tables**

Table S1: Characteristics of imputed data

Table S2: Characteristics of observed data and missing values

Table S3: MVPA and sedentary time by health condition at each time point: unadjusted for confounders or other conditions

Table S4: Cross-sectional regression models for MVPA at average age 12, 14 and 16: minimally adjusted

### **List of Supplementary Figures**

Figure S1: Venn diagrams of combinations of multiple conditions at ages 12, 14 and 16.

Figure S2: Observed average minutes of MVPA (left) and sedentary time (right) for different health conditions and by sex.

Table S1: Characteristics of imputed data

|                                   | Age 12<br>(n=5735)    | Age 14<br>(n=4078) | Age 16<br>(n=2198) |     |
|-----------------------------------|-----------------------|--------------------|--------------------|-----|
|                                   | Mean (sd)             | Mean (sd)          | Mean (sd)          |     |
| MVPA                              | 57 (29)               | 52 (27)            | 47 (27)            |     |
| Sedentary time                    | 354 (73)              | 415 (81)           | 475 (84)           |     |
|                                   | %                     | %                  | %                  |     |
| <b>Condition</b>                  |                       |                    |                    |     |
| Asthma                            | 24%                   | 23%                | 27%                |     |
| Eczema                            | 21%                   | 21%                | 27%                |     |
| Overweight                        | 14%                   | 13%                | 13%                |     |
| Obese                             | 15%                   | 13%                | 12%                |     |
| <b>Combinations of conditions</b> |                       |                    |                    |     |
| None                              | 47%                   | 49%                | 44%                |     |
| Asthma only                       | 10%                   | 11%                | 11%                |     |
| Eczema only                       | 9%                    | 10%                | 12%                |     |
| Obese only                        | 8%                    | 7%                 | 6%                 |     |
| Asthma & Eczema                   | 6%                    | 6%                 | 8%                 |     |
| Asthma & Obese                    | 3%                    | 3%                 | 2%                 |     |
| Eczema & Obese                    | 2%                    | 2%                 | 2%                 |     |
| Asthma, Eczema & Obese            | 2%                    | 1%                 | 2%                 |     |
| <b>Confounders</b>                |                       |                    |                    |     |
| Sex (female)                      | 53%                   | 53%                | 55%                |     |
| Mother's education:               | None/CSE              | 11%                | 9%                 | 8%  |
|                                   | Vocational            | 9%                 | 8%                 | 8%  |
|                                   | O level (exams at 16) | 47%                | 47%                | 47% |
|                                   | A level (exams at 18) | 15%                | 16%                | 15% |
|                                   | Degree                | 18%                | 20%                | 22% |
| Social class:                     | I Professional        | 13%                | 14%                | 16% |
|                                   | II Manager & Tech     | 47%                | 49%                | 49% |
|                                   | III Skilled, non-man  | 26%                | 25%                | 23% |
|                                   | III Skilled, manual   | 9%                 | 7%                 | 7%  |
|                                   | IV Partly skilled     | 4%                 | 4%                 | 4%  |
|                                   | V Unskilled           | 1%                 | 1%                 | 1%  |

Table S2: Characteristics of observed data and missing values

|                                   | Age 12 (n=5735) |             | Age 14 (n=4078) |             | Age 16 (n=2198) |             |
|-----------------------------------|-----------------|-------------|-----------------|-------------|-----------------|-------------|
|                                   | Mean (sd)       | Missing (%) | Mean (sd)       | Missing (%) | Mean (sd)       | Missing (%) |
| MVPA                              | 57 (29)         | 0 (0%)      | 52 (27)         | 0 (0%)      | 47 (27)         | 0 (0%)      |
| Sedentary time                    | 354 (73)        | 0 (0%)      | 415 (81)        | 0 (0%)      | 475 (84)        | 0 (0%)      |
|                                   | %               |             | %               |             | %               |             |
| <b>Condition</b>                  |                 |             |                 |             |                 |             |
| Asthma                            | 24%             | 454 (8%)    | 23%             | 282 (7%)    | 27%             | 74 (3%)     |
| Eczema                            | 21%             | 842 (15%)   | 21%             | 542 (13%)   | 27%             | 114 (5%)    |
| Overweight                        | 14%             | 9 (0.2%)    | 13%             | 8 (0.2%)    | 13%             | 25 (1%)     |
| Obese                             | 15%             | 9 (0.2%)    | 13%             | 8 (0.2%)    | 12%             | 25 (1%)     |
| <b>Combinations of conditions</b> |                 |             |                 |             |                 |             |
| None                              | 55%             | 850 (15%)   | 56%             | 549 (13%)   | 51%             | 137 (6%)    |
| Asthma only                       | 13%             |             | 13%             |             | 13%             |             |
| Eczema only                       | 11%             |             | 12%             |             | 14%             |             |
| Obese only                        | 8%              |             | 7%              |             | 7%              |             |
| Asthma & Eczema                   | 7%              |             | 7%              |             | 9%              |             |
| Asthma & Obese                    | 3%              |             | 3%              |             | 2%              |             |
| Eczema & Obese                    | 2%              |             | 2%              |             | 2%              |             |
| Asthma, Eczema & Obese            | 2%              |             | 1%              |             | 2%              |             |
| <b>Confounders</b>                |                 |             |                 |             |                 |             |
| Sex (female)                      | 53%             | 0 (0%)      | 53%             | 0 (0%)      | 55%             | 0 (0%)      |
| Mother's education:               |                 |             |                 |             |                 |             |
| None/CSE                          | 11%             | 230 (4%)    | 9%              | 136 (4%)    | 8%              | 71 (3%)     |
| Vocational                        | 9%              |             | 8%              |             | 8%              |             |
| O level (exams at 16)             | 47%             |             | 47%             |             | 47%             |             |
| A level (exams at 18)             | 15%             |             | 16%             |             | 15%             |             |
| Degree                            | 18%             |             | 20%             |             | 22%             |             |
| Social class:                     |                 |             |                 |             |                 |             |
| I Professional                    | 13%             | 365 (6%)    | 14%             | 213 (5%)    | 16%             | 118 (5%)    |
| II Manager & Tech                 | 47%             |             | 49%             |             | 49%             |             |
| III Skilled, non-man              | 26%             |             | 25%             |             | 23%             |             |
| III Skilled, manual               | 9%              |             | 7%              |             | 7%              |             |
| IV Partly skilled                 | 4%              |             | 4%              |             | 4%              |             |
| V Unskilled                       | 1%              |             | 1%              |             | 1%              |             |

Table S3: MVPA and sedentary time by health condition at each time point: unadjusted for confounders or other conditions

|                       | Mean | sd | Age 12 (n=5735)             |                     |                      | Age 14 (n=4078) |    |                             | Age 16 (n=2198)     |                      |      |    |                             |                     |                      |
|-----------------------|------|----|-----------------------------|---------------------|----------------------|-----------------|----|-----------------------------|---------------------|----------------------|------|----|-----------------------------|---------------------|----------------------|
|                       |      |    | Diff <sup>1</sup><br>(mins) | 95% CI <sup>1</sup> | p-value <sup>2</sup> | Mean            | sd | Diff <sup>1</sup><br>(mins) | 95% CI <sup>1</sup> | p-value <sup>2</sup> | Mean | sd | Diff <sup>1</sup><br>(mins) | 95% CI <sup>1</sup> | p-value <sup>2</sup> |
| <b>MVPA</b>           |      |    |                             |                     |                      |                 |    |                             |                     |                      |      |    |                             |                     |                      |
| Asthma                | 56   | 28 | -0.47                       | (-2.29, 1.35)       | 0.613                | 53              | 27 | 1.25                        | (-0.79, 3.30)       | 0.229                | 46   | 29 | -1.58                       | (-4.8, 1.02)        | 0.233                |
| Eczema                | 54   | 26 | -3.13                       | (-5.-8, -1.18)      | 0.002                | 51              | 27 | -1.44                       | (-0.358, 0.70)      | 0.187                | 46   | 27 | -0.62                       | (-3.20, 1.96)       | 0.638                |
| Overweight            | 52   | 24 | -5.63                       | (-7.81, -3.44)      | <0.0005              | 50              | 27 | -2.47                       | (-4.98, 0.03)       | 0.053                | 45   | 28 | -1.64                       | (-5.04, 1.76)       | 0.344                |
| Obese                 | 51   | 25 | -7.02                       | (-9.11, -4.94)      | <0.0005              | 46              | 25 | -6.02                       | (-8.51, -3.52)      | <0.0005              | 42   | 25 | -5.46                       | (-8.77, -2.15)      | 0.001                |
| <b>Sedentary time</b> |      |    |                             |                     |                      |                 |    |                             |                     |                      |      |    |                             |                     |                      |
| Asthma                | 349  | 72 | -6.66                       | (-11.31, -2.02)     | 0.005                | 405             | 83 | -13.15                      | (-19.31, -7.00)     | <0.0005              | 474  | 89 | -1.44                       | (-9.60, 6.72)       | 0.729                |
| Eczema                | 355  | 72 | 1.12                        | (-3.86, 6.10)       | 0.660                | 418             | 82 | 4.11                        | (-2.60, 10.81)      | 0.229                | 477  | 82 | 2.82                        | (-5.22, 10.85)      | 0.492                |
| Overweight            | 363  | 71 | 9.56                        | (4.04, 15.08)       | 0.001                | 424             | 86 | 10.61                       | (3.11, 18.11)       | 0.006                | 480  | 82 | 5.44                        | (-5.19, 16.08)      | 0.316                |
| Obese                 | 362  | 75 | 8.85                        | (3.57, 14.12)       | 0.001                | 428             | 79 | 15.26                       | (7.78, 22.73)       | <0.0005              | 485  | 86 | 11.02                       | (0.67, 21.38)       | 0.037                |

<sup>1</sup> Diff and 95% CI are the mean difference between children with the condition and children without the condition and associated 95% confidence interval.

<sup>2</sup> P-value refers to t-test comparing those with the condition to those without.

Table S4: Cross-sectional regression models for MVPA at average age 12, 14 and 16: minimally adjusted

|                          | Age 12 (n=5735)             |                 | Age 14 (n=4078) |                             | Age 16 (n=2198) |         |                             |                 |         |
|--------------------------|-----------------------------|-----------------|-----------------|-----------------------------|-----------------|---------|-----------------------------|-----------------|---------|
|                          | Diff <sup>3</sup><br>(mins) | 95 % CI         | p-value         | Diff <sup>3</sup><br>(mins) | 95 % CI         | p-value | Diff <sup>3</sup><br>(mins) | 95 % CI         | p-value |
| <b>MVPA</b>              |                             |                 |                 |                             |                 |         |                             |                 |         |
| <b>All<sup>1</sup></b>   |                             |                 |                 |                             |                 |         |                             |                 |         |
| Asthma                   | -1.34                       | (-3.06, 0.38)   | 0.126           | 0.15                        | (-1.84, 2.14)   | 0.884   | -2.59                       | (-5.12, -0.06)  | 0.045   |
| Eczema                   | -1.95                       | (-3.78, -0.12)  | 0.037           | -0.72                       | (-2.79, 1.35)   | 0.493   | 0.67                        | (-1.84, 3.17)   | 0.601   |
| Overweight               | -7.34                       | (-9.39, -5.28)  | <0.0005         | -3.10                       | (-5.50, -0.69)  | 0.012   | -2.05                       | (-5.32, 1.22)   | 0.219   |
| Obese                    | -8.64                       | (-10.61, -6.67) | <0.0005         | -7.05                       | (-9.45, -4.65)  | <0.0005 | -5.15                       | (-8.35, -1.95)  | 0.002   |
| <b>Boys<sup>2</sup></b>  |                             |                 |                 |                             |                 |         |                             |                 |         |
| Asthma                   | -1.95                       | (-4.68, 0.77)   | 0.161           | 0.66                        | (-2.50, 3.83)   | 0.680   | -2.87                       | (-7.07, 1.33)   | 0.180   |
| Eczema                   | -3.73                       | (-6.91, -0.54)  | 0.022           | -0.21                       | (-3.76, 3.35)   | 0.910   | 2.03                        | (-2.42, 6.48)   | 0.371   |
| Overweight               | -11.16                      | (-14.60, -7.72) | <0.0005         | -4.40                       | (-8.45, -0.35)  | 0.033   | -4.64                       | (-10.33, 1.06)  | 0.110   |
| Obese                    | -12.39                      | (-15.63, -9.14) | <0.0005         | -10.00                      | (-13.87, -6.14) | <0.0005 | -9.08                       | (-14.62, -3.54) | 0.001   |
| <b>Girls<sup>2</sup></b> |                             |                 |                 |                             |                 |         |                             |                 |         |
| Asthma                   | -0.89                       | (-2.97, 1.20)   | 0.404           | -0.56                       | (-3.01, 1.89)   | 0.656   | -2.67                       | (-5.71, 0.37)   | 0.085   |
| Eczema                   | -0.52                       | (-2.55, 1.51)   | 0.616           | -1.19                       | (-3.76, 1.37)   | 0.361   | -0.40                       | (-3.24, 2.44)   | 0.780   |
| Overweight               | -3.89                       | (-6.26, -1.53)  | 0.001           | -1.90                       | (-4.74, 0.93)   | 0.188   | 0.07                        | (-3.70, 3.83)   | 0.972   |
| Obese                    | -5.05                       | (-7.35, -2.76)  | <0.0005         | -4.11                       | (-7.06, -1.16)  | 0.006   | -2.03                       | (-5.73, 1.67)   | 0.282   |
| <b>Sedentary time</b>    |                             |                 |                 |                             |                 |         |                             |                 |         |
| <b>All<sup>1</sup></b>   |                             |                 |                 |                             |                 |         |                             |                 |         |
| Asthma                   | -6.45                       | (-11.21, -1.69) | 0.008           | -12.07                      | (-18.25, -5.89) | <0.0005 | -0.56                       | (-8.83, 7.72)   | 0.895   |
| Eczema                   | 1.69                        | (-3.38, 6.76)   | 0.513           | 4.62                        | (-2.05, 11.30)  | 0.174   | 1.81                        | (-6.30, 9.93)   | 0.661   |
| Overweight               | 11.81                       | (6.26, 17.36)   | <0.0005         | 12.70                       | (5.28, 20.12)   | 0.001   | 6.58                        | (-4.05, 17.21)  | 0.225   |
| Obese                    | 11.64                       | (6.32, 16.97)   | <0.0005         | 18.96                       | (11.54, 26.37)  | <0.0005 | 11.06                       | (0.66, 21.46)   | 0.037   |
| <b>Boys<sup>2</sup></b>  |                             |                 |                 |                             |                 |         |                             |                 |         |
| Asthma                   | -6.84                       | (-13.42, -0.25) | 0.042           | -9.60                       | (-18.68, -0.52) | 0.038   | 1.25                        | (-11.48, 13.98) | 0.847   |
| Eczema                   | 3.96                        | (-3.43, 11.35)  | 0.294           | 4.63                        | (-5.47, 14.72)  | 0.368   | -1.48                       | (-14.91, 11.95) | 0.829   |
| Overweight               | 13.19                       | (5.03, 21.36)   | 0.002           | 8.15                        | (-3.26, 19.56)  | 0.161   | 14.58                       | (-2.45, 31.61)  | 0.093   |
| Obese                    | 11.13                       | (3.443, 18.84)  | 0.005           | 26.34                       | (15.47, 37.22)  | <0.0005 | 18.05                       | (1.48, 34.62)   | 0.033   |
| <b>Girls<sup>2</sup></b> |                             |                 |                 |                             |                 |         |                             |                 |         |
| Asthma                   | -5.92                       | (-12.65, 0.81)  | 0.085           | -14.70                      | (-23.30, -6.10) | 0.001   | -1.51                       | (-12.39, 9.37)  | 0.786   |
| Eczema                   | -0.25                       | (-7.14, 6.63)   | 0.943           | 4.50                        | (-4.41, 13.41)  | 0.321   | 4.36                        | (-5.97, 14.69)  | 0.408   |
| Overweight               | 10.64                       | (3.06, 18.22)   | 0.006           | 16.48                       | (6.74, 26.22)   | 0.001   | 0.27                        | (-13.24, 13.77) | 0.969   |
| Obese                    | 12.06                       | (4.68, 19.44)   | 0.001           | 11.83                       | (1.69, 21.98)   | 0.022   | 5.58                        | (-7.71, 18.86)  | 0.410   |

<sup>1</sup> Model adjusted for child age and sex. <sup>2</sup> Model adjusted for child age

<sup>3</sup> Coefficients indicate difference in minutes of MVPA/sedentary time between a child with and without the condition.

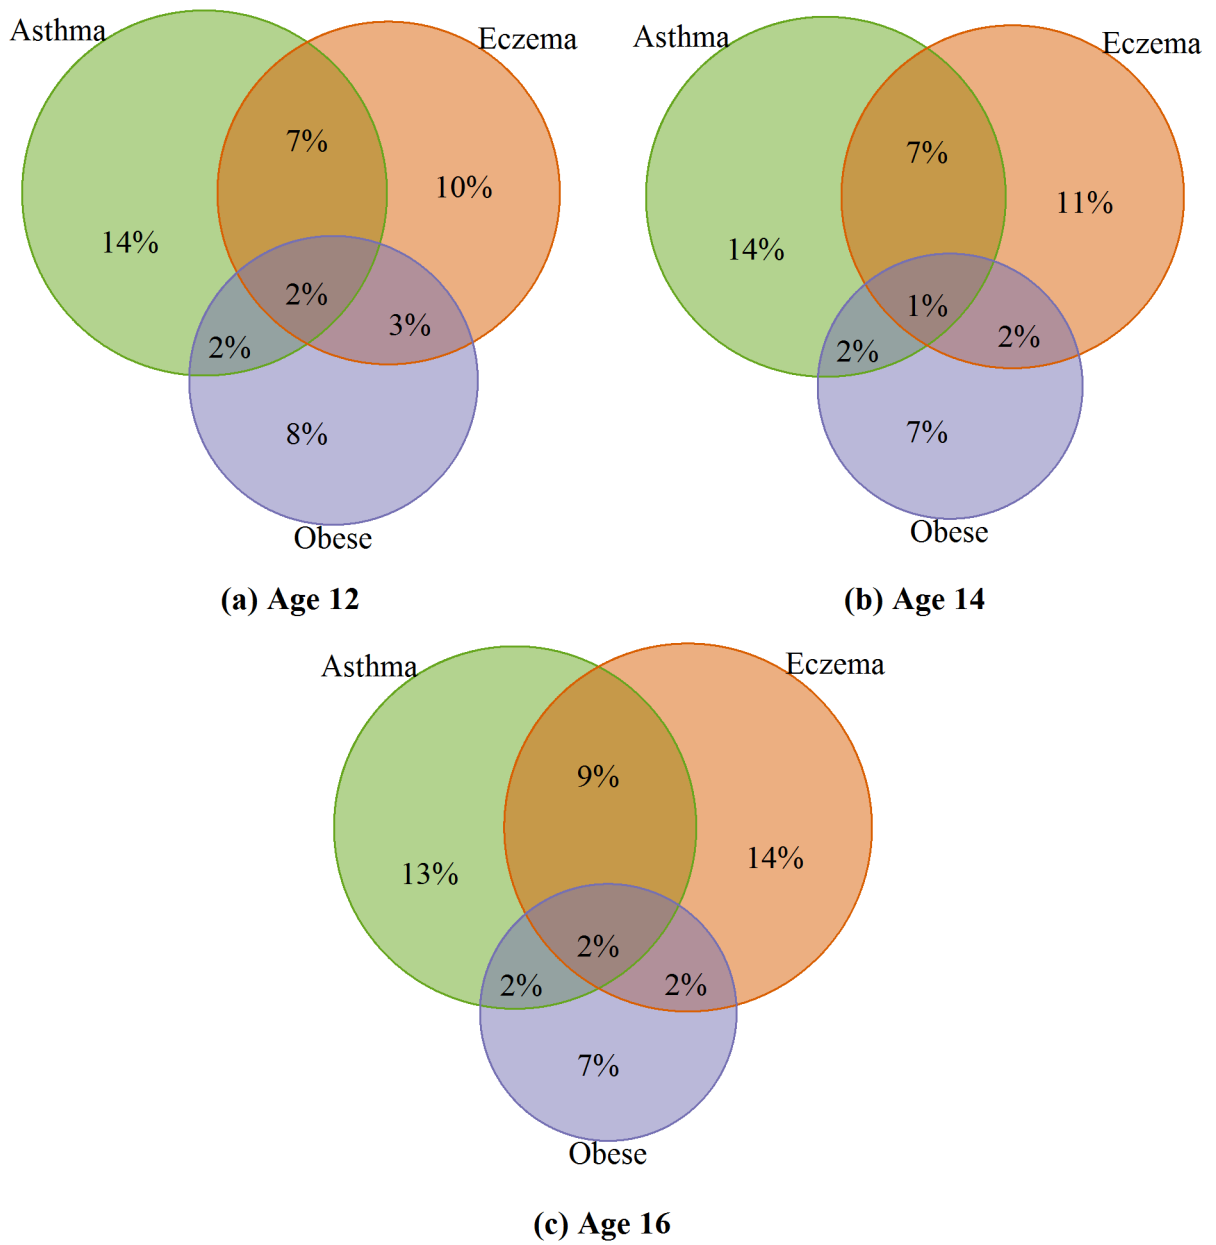

Figure S1: Venn diagrams of combinations of multiple conditions at ages 12, 14 and 16.

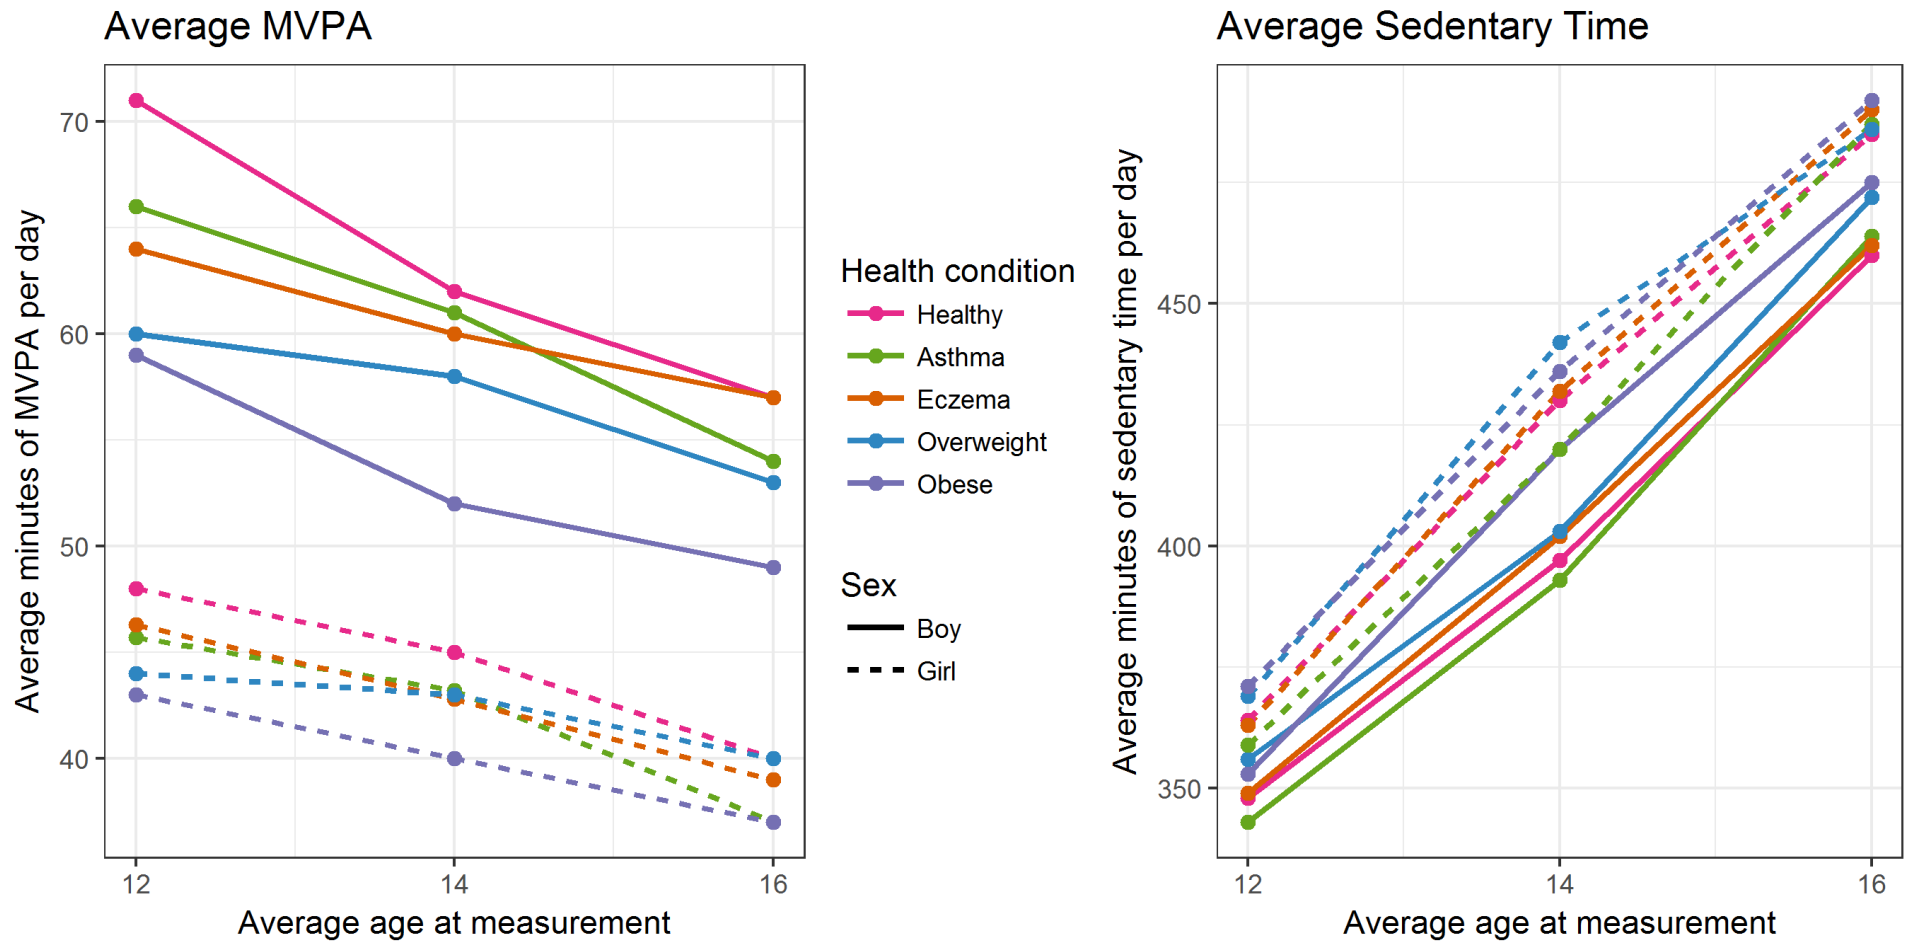

Figure S2: Observed average minutes of MVPA (left) and sedentary time (right) for different health conditions and by sex.
